# Supplementary material for: Plasma Branched-Chain and Aromatic Amino Acids in Relation to Hypertension
Source: PubMed Central journal article supplement (PMC7764357; doi:10.3390/nu12123791), 2020-12-10
Supplement: nutrients-12-03791-s001.pdf [file nutrients-12-03791-s001.pdf]

Supplementary Material

**Table S1.** Quartile cut-off values ( $\mu\text{mol/L}$ ) of branched-chain amino acids (BCAAs) and aromatic amino acids (AAAs), and the corresponding distribution of study subjects across quartile categories.

| Amino.acids | Quartile categories | Cut-off values    |                   | Healthy        |                  | Hypertension   |                  |
|-------------|---------------------|-------------------|-------------------|----------------|------------------|----------------|------------------|
|             |                     | Male              | Female            | Male, <i>n</i> | Female, <i>n</i> | Male, <i>n</i> | Female, <i>n</i> |
| Ile         | 1                   | <53.55            | <41.42            | 298            | 403              | 267            | 190              |
|             | 2                   | 53.55 to <60.54   | 41.42 to <46.10   | 298            | 405              | 299            | 205              |
|             | 3                   | 60.54 to <68.86   | 46.10 to <51.91   | 298            | 402              | 354            | 313              |
|             | 4                   | $\geq 68.86$      | $\geq 51.91$      | 298            | 403              | 553            | 555              |
| Leu         | 1                   | <107.62           | <83.16            | 298            | 403              | 292            | 164              |
|             | 2                   | 107.62 to <119.43 | 83.16 to <93.10   | 298            | 404              | 273            | 269              |
|             | 3                   | 119.43 to <131.66 | 93.10 to <102.52  | 298            | 403              | 329            | 281              |
|             | 4                   | $\geq 131.66$     | $\geq 102.52$     | 298            | 403              | 579            | 549              |
| Val         | 1                   | <196.33           | <157.25           | 298            | 403              | 272            | 150              |
|             | 2                   | 196.33 to <216.30 | 157.25 to <174.99 | 298            | 404              | 288            | 213              |
|             | 3                   | 216.30 to <238.97 | 174.99 to <193.15 | 298            | 403              | 356            | 263              |
|             | 4                   | $\geq 238.97$     | $\geq 193.15$     | 298            | 403              | 557            | 637              |
| Phe         | 1                   | <52.71            | <47.39            | 298            | 403              | 180            | 123              |
|             | 2                   | 52.71 to <57.35   | 47.39 to <51.44   | 298            | 404              | 274            | 196              |
|             | 3                   | 57.35 to <62.79   | 51.44 to <55.80   | 298            | 403              | 390            | 292              |
|             | 4                   | $\geq 62.79$      | $\geq 55.80$      | 298            | 403              | 629            | 652              |
| Tyr         | 1                   | <54.61            | <48.31            | 298            | 403              | 159            | 103              |
|             | 2                   | 54.61 to <61.44   | 48.31 to <54.28   | 298            | 404              | 236            | 189              |
|             | 3                   | 61.44 to <69.17   | 54.28 to <61.01   | 298            | 403              | 371            | 310              |
|             | 4                   | $\geq 69.17$      | $\geq 61.01$      | 298            | 403              | 707            | 661              |
| Trp         | 1                   | <51.69            | <43.14            | 298            | 403              | 367            | 235              |
|             | 2                   | 51.69 to <56.91   | 43.14 to <47.78   | 298            | 404              | 330            | 241              |
|             | 3                   | 56.91 to <62.36   | 47.78 to <52.32   | 298            | 403              | 363            | 326              |
|             | 4                   | $\geq 62.36$      | $\geq 52.32$      | 298            | 403              | 413            | 461              |

Ile, isoleucine; Leu, leucine; Lys, lysine; Phe, phenylalanine; Trp, tryptophan; Tyr, tyrosine; Val, valine.

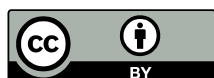

© 2020 by the authors. Submitted for possible open access publication under the terms and conditions of the Creative Commons Attribution (CC BY) license (<http://creativecommons.org/licenses/by/4.0/>).
